# Supplementary material
Source: Springer Nature journal article supplement (https://www.springermedizin.de/resource/supplementary/12955_2013_1318_MOESM5_ESM.pdf/9559548)
Supplement: MOESM5 [file 9559548]

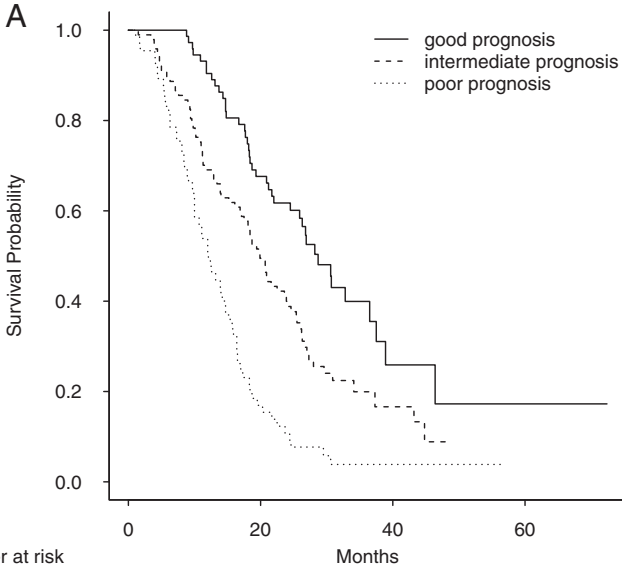

Number at risk

|                              | 0  | 20 | 40 | 60 |
|------------------------------|----|----|----|----|
| good prognosis —             | 73 | 47 | 5  | 2  |
| intermediate prognosis - - - | 97 | 48 | 5  |    |
| poor prognosis .....         | 66 | 11 | 2  |    |

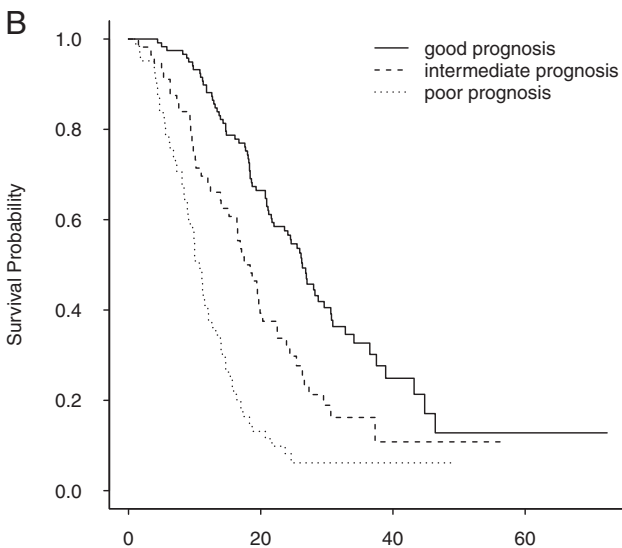

Number at risk

|                              | 0   | 20 | 40 | 60 |
|------------------------------|-----|----|----|----|
| good prognosis —             | 118 | 76 | 9  | 2  |
| intermediate prognosis - - - | 56  | 22 | 2  |    |
| poor prognosis .....         | 62  | 8  | 1  |    |
